# Supplementary material for: Patterns and determinants of essential neonatal care utilization among underprivileged ethnic groups in Midwest Nepal: a mixed method study
Source: PubMed Central journal article supplement (PMC6712593; doi:10.1186/s12884-019-2465-6), 2019-08-27
Supplement: 12884_2019_2465_MOESM2_ESM.pdf [file 12884_2019_2465_MOESM2_ESM.pdf]

## Questionnaire

### Section 1: Basic Information

|                             |                                             |
|-----------------------------|---------------------------------------------|
| Cluster number: ___ ___ ___ | Woman's name: .....                         |
| Name of the last child:     | Sex:                      Age:              |
| Name of VDC:                | Ward Number:                                |
| Interviewer's name:         | Date of interview: ___ ___ / ___ ___ / 2074 |

### Section 2: Individual Characteristics

| QUESTIONNAIRE                                                                                                                     | RESULT                                                                                                                                                                                                                                                                                                                                                                                                                                                                                                                                                                                                                                                                                                                                                                                                                                                                         | SKIP    |      |         |             |       |   |               |   |   |         |   |   |                 |   |   |                   |   |   |                     |   |   |  |
|-----------------------------------------------------------------------------------------------------------------------------------|--------------------------------------------------------------------------------------------------------------------------------------------------------------------------------------------------------------------------------------------------------------------------------------------------------------------------------------------------------------------------------------------------------------------------------------------------------------------------------------------------------------------------------------------------------------------------------------------------------------------------------------------------------------------------------------------------------------------------------------------------------------------------------------------------------------------------------------------------------------------------------|---------|------|---------|-------------|-------|---|---------------|---|---|---------|---|---|-----------------|---|---|-------------------|---|---|---------------------|---|---|--|
| 1. How old are you?<br><i>Probe: How old were you at your last birthday?</i>                                                      | Age (in completed years) ___                                                                                                                                                                                                                                                                                                                                                                                                                                                                                                                                                                                                                                                                                                                                                                                                                                                   |         |      |         |             |       |   |               |   |   |         |   |   |                 |   |   |                   |   |   |                     |   |   |  |
| 2. What is your educational level?<br>3. What is your husband's educational status?                                               | <table style="margin-left: auto; margin-right: auto;"> <tr> <td></td> <td style="text-align: center;">Self</td> <td style="text-align: center;">Husband</td> </tr> <tr> <td>Illiterate</td> <td style="text-align: center;">1</td> <td style="text-align: center;">1</td> </tr> <tr> <td>Literate only</td> <td style="text-align: center;">2</td> <td style="text-align: center;">2</td> </tr> <tr> <td>Primary</td> <td style="text-align: center;">3</td> <td style="text-align: center;">3</td> </tr> <tr> <td>Secondary level</td> <td style="text-align: center;">4</td> <td style="text-align: center;">4</td> </tr> <tr> <td>Certificate level</td> <td style="text-align: center;">5</td> <td style="text-align: center;">5</td> </tr> <tr> <td>Bachelors and above</td> <td style="text-align: center;">6</td> <td style="text-align: center;">6</td> </tr> </table> |         | Self | Husband | Illiterate  | 1     | 1 | Literate only | 2 | 2 | Primary | 3 | 3 | Secondary level | 4 | 4 | Certificate level | 5 | 5 | Bachelors and above | 6 | 6 |  |
|                                                                                                                                   | Self                                                                                                                                                                                                                                                                                                                                                                                                                                                                                                                                                                                                                                                                                                                                                                                                                                                                           | Husband |      |         |             |       |   |               |   |   |         |   |   |                 |   |   |                   |   |   |                     |   |   |  |
| Illiterate                                                                                                                        | 1                                                                                                                                                                                                                                                                                                                                                                                                                                                                                                                                                                                                                                                                                                                                                                                                                                                                              | 1       |      |         |             |       |   |               |   |   |         |   |   |                 |   |   |                   |   |   |                     |   |   |  |
| Literate only                                                                                                                     | 2                                                                                                                                                                                                                                                                                                                                                                                                                                                                                                                                                                                                                                                                                                                                                                                                                                                                              | 2       |      |         |             |       |   |               |   |   |         |   |   |                 |   |   |                   |   |   |                     |   |   |  |
| Primary                                                                                                                           | 3                                                                                                                                                                                                                                                                                                                                                                                                                                                                                                                                                                                                                                                                                                                                                                                                                                                                              | 3       |      |         |             |       |   |               |   |   |         |   |   |                 |   |   |                   |   |   |                     |   |   |  |
| Secondary level                                                                                                                   | 4                                                                                                                                                                                                                                                                                                                                                                                                                                                                                                                                                                                                                                                                                                                                                                                                                                                                              | 4       |      |         |             |       |   |               |   |   |         |   |   |                 |   |   |                   |   |   |                     |   |   |  |
| Certificate level                                                                                                                 | 5                                                                                                                                                                                                                                                                                                                                                                                                                                                                                                                                                                                                                                                                                                                                                                                                                                                                              | 5       |      |         |             |       |   |               |   |   |         |   |   |                 |   |   |                   |   |   |                     |   |   |  |
| Bachelors and above                                                                                                               | 6                                                                                                                                                                                                                                                                                                                                                                                                                                                                                                                                                                                                                                                                                                                                                                                                                                                                              | 6       |      |         |             |       |   |               |   |   |         |   |   |                 |   |   |                   |   |   |                     |   |   |  |
| 4. What is your occupation?<br>5. What is your husband's occupation?                                                              | <table style="margin-left: auto; margin-right: auto;"> <tr> <td></td> <td style="text-align: center;">Self</td> <td style="text-align: center;">Husband</td> </tr> <tr> <td>Agriculture</td> <td style="text-align: center;">1</td> <td style="text-align: center;">1</td> </tr> <tr> <td>Business</td> <td style="text-align: center;">2</td> <td style="text-align: center;">2</td> </tr> <tr> <td>Service</td> <td style="text-align: center;">3</td> <td style="text-align: center;">3</td> </tr> <tr> <td>Labour</td> <td style="text-align: center;">4</td> <td style="text-align: center;">4</td> </tr> <tr> <td>House work</td> <td style="text-align: center;">5</td> <td style="text-align: center;">5</td> </tr> <tr> <td>Others</td> <td style="text-align: center;">6</td> <td style="text-align: center;">6</td> </tr> </table>                                  |         | Self | Husband | Agriculture | 1     | 1 | Business      | 2 | 2 | Service | 3 | 3 | Labour          | 4 | 4 | House work        | 5 | 5 | Others              | 6 | 6 |  |
|                                                                                                                                   | Self                                                                                                                                                                                                                                                                                                                                                                                                                                                                                                                                                                                                                                                                                                                                                                                                                                                                           | Husband |      |         |             |       |   |               |   |   |         |   |   |                 |   |   |                   |   |   |                     |   |   |  |
| Agriculture                                                                                                                       | 1                                                                                                                                                                                                                                                                                                                                                                                                                                                                                                                                                                                                                                                                                                                                                                                                                                                                              | 1       |      |         |             |       |   |               |   |   |         |   |   |                 |   |   |                   |   |   |                     |   |   |  |
| Business                                                                                                                          | 2                                                                                                                                                                                                                                                                                                                                                                                                                                                                                                                                                                                                                                                                                                                                                                                                                                                                              | 2       |      |         |             |       |   |               |   |   |         |   |   |                 |   |   |                   |   |   |                     |   |   |  |
| Service                                                                                                                           | 3                                                                                                                                                                                                                                                                                                                                                                                                                                                                                                                                                                                                                                                                                                                                                                                                                                                                              | 3       |      |         |             |       |   |               |   |   |         |   |   |                 |   |   |                   |   |   |                     |   |   |  |
| Labour                                                                                                                            | 4                                                                                                                                                                                                                                                                                                                                                                                                                                                                                                                                                                                                                                                                                                                                                                                                                                                                              | 4       |      |         |             |       |   |               |   |   |         |   |   |                 |   |   |                   |   |   |                     |   |   |  |
| House work                                                                                                                        | 5                                                                                                                                                                                                                                                                                                                                                                                                                                                                                                                                                                                                                                                                                                                                                                                                                                                                              | 5       |      |         |             |       |   |               |   |   |         |   |   |                 |   |   |                   |   |   |                     |   |   |  |
| Others                                                                                                                            | 6                                                                                                                                                                                                                                                                                                                                                                                                                                                                                                                                                                                                                                                                                                                                                                                                                                                                              | 6       |      |         |             |       |   |               |   |   |         |   |   |                 |   |   |                   |   |   |                     |   |   |  |
| 6. Now I would like to ask you about all the pregnancies that you have had during your life. How many children do you give birth? | Sons <input style="width: 30px; height: 20px;" type="text"/> <input style="width: 30px; height: 20px;" type="text"/> Daughters <input style="width: 30px; height: 20px;" type="text"/> <input style="width: 30px; height: 20px;" type="text"/>                                                                                                                                                                                                                                                                                                                                                                                                                                                                                                                                                                                                                                 |         |      |         |             |       |   |               |   |   |         |   |   |                 |   |   |                   |   |   |                     |   |   |  |
| 7. Have you ever given birth to a boy or girl who was born alive but later died?<br><i>(If no, probe)</i>                         | <table style="width: 100%;"> <tr> <td style="width: 70%;">Yes</td> <td style="width: 30%; text-align: center;">1</td> </tr> <tr> <td>No</td> <td style="text-align: center;">2 →</td> </tr> </table>                                                                                                                                                                                                                                                                                                                                                                                                                                                                                                                                                                                                                                                                           | Yes     | 1    | No      | 2 →         | Qn. 9 |   |               |   |   |         |   |   |                 |   |   |                   |   |   |                     |   |   |  |
| Yes                                                                                                                               | 1                                                                                                                                                                                                                                                                                                                                                                                                                                                                                                                                                                                                                                                                                                                                                                                                                                                                              |         |      |         |             |       |   |               |   |   |         |   |   |                 |   |   |                   |   |   |                     |   |   |  |
| No                                                                                                                                | 2 →                                                                                                                                                                                                                                                                                                                                                                                                                                                                                                                                                                                                                                                                                                                                                                                                                                                                            |         |      |         |             |       |   |               |   |   |         |   |   |                 |   |   |                   |   |   |                     |   |   |  |

|                                                                                                                                    |                                                                                                                                                                                                                                                            |        |
|------------------------------------------------------------------------------------------------------------------------------------|------------------------------------------------------------------------------------------------------------------------------------------------------------------------------------------------------------------------------------------------------------|--------|
| <b>8.</b> How many children died?                                                                                                  | Sons <input type="text"/> <input type="text"/> Girls <input type="text"/> <input type="text"/>                                                                                                                                                             |        |
| <b>9.</b> Have you ever had a pregnancy that did not end in a live birth?                                                          | Yes 1<br>No 2 →                                                                                                                                                                                                                                            | Qn. 11 |
| <b>10.</b> How many pregnancies have you had that did not end in a LB?                                                             | Pregnancy losses <input type="text"/> <input type="text"/>                                                                                                                                                                                                 |        |
| <b>11.</b> What is the birth interval between the current birth and the preceding birth? (if more than one child)                  | <input type="text"/> <input type="text"/> Month                                                                                                                                                                                                            |        |
| <b>12.</b> Now I would like to ask you about your knowledge on essential neonatal care. Did you know about essential newborn care? | Yes 1<br>No 2 →                                                                                                                                                                                                                                            | Qn. 15 |
| <b>13.</b> What type of care lies under essential newborn care? (More than one answer is possible)                                 | Wrap in clean and dry cloth 1<br>Breastfeed within 1 hr after birth 2<br>Bathing after 24 hour of birth 3<br>Place the baby in skin- skin contact 4<br>Delivery with the assistance of SBA 5<br>Postnatal check up of newborn baby 6<br>Other (specify) 98 |        |
| <b>14.</b> Mention the source of information about essential newborn care.                                                         | TV/Radio 1<br>Family/relatives 2<br>Health professional 3<br>Others (Specify) 5                                                                                                                                                                            |        |
| <b>15.</b> Did you heard about newborn danger signs?                                                                               | Yes 1<br>No 2 →                                                                                                                                                                                                                                            | Sec. 2 |
| <b>16.</b> What newborn danger signs do you know? (more than one answer is possible)                                               | Fast breathing 1<br>Severe chest indrawing 2<br>Unable to breastfeed 3<br>Fever 4<br>Hypothermia 5<br>Skin pustules 6<br>Umbilicus pus or red to skin and 7<br>Lethargic or unconscious 8                                                                  |        |

|                                                                  |                     |    |  |
|------------------------------------------------------------------|---------------------|----|--|
|                                                                  | Others              | 9  |  |
| 17. Mention the source of information about newborn Danger signs | TV/Radio            | 1  |  |
|                                                                  | Family/relatives    | 2  |  |
|                                                                  | Health professional | 3  |  |
|                                                                  | Others (Specify)    | 96 |  |

### Section 3: Household Characteristics

| QUESTIONNAIRE                                                       |                                                                     | RESULT                                |     | SKIP |
|---------------------------------------------------------------------|---------------------------------------------------------------------|---------------------------------------|-----|------|
| 1. To what ethnic group does the head of this HH belong?            |                                                                     | Ethnic group _____                    |     |      |
|                                                                     |                                                                     | Other ethnic group ( <i>specify</i> ) | 996 |      |
| 2. What is your religion?                                           |                                                                     | Hindu                                 | 1   |      |
|                                                                     |                                                                     | Buddhist                              | 2   |      |
|                                                                     |                                                                     | Islam                                 | 3   |      |
|                                                                     |                                                                     | Kirat                                 | 4   |      |
|                                                                     |                                                                     | Christian                             | 5   |      |
|                                                                     |                                                                     | Other (Specify)                       | 96  |      |
| 3. What is the ownership of the house that you currently reside in? |                                                                     | Self Owned                            | 1   |      |
|                                                                     |                                                                     | Rented/ Not owned                     | 2   |      |
|                                                                     |                                                                     | No response                           | 3   |      |
| 4                                                                   | Does your household have following items?<br>(Read out the options) | Yes                                   | No  |      |
| 4.1                                                                 | Electricity                                                         | 1                                     | 2   |      |
| 4.2                                                                 | Television                                                          | 1                                     | 2   |      |
| 4.3                                                                 | Mobile telephone                                                    | 1                                     | 2   |      |
| 4.4                                                                 | Refrigerator                                                        | 1                                     | 2   |      |
| 4.5                                                                 | Computer                                                            | 1                                     | 2   |      |
| 4.6                                                                 | Fan                                                                 | 1                                     | 2   |      |
| 5                                                                   | Does any member of this household own the following items?          | Yes                                   | No  |      |
| 5.1                                                                 | Bicycle/ rickshaw                                                   | 1                                     | 2   |      |
| 5.2                                                                 | Motorcycle/ Scooter                                                 | 1                                     | 2   |      |
| 5.3                                                                 | Three wheel tempo                                                   | 1                                     | 2   |      |
| 5.4                                                                 | Car or Truck or Heavy Vehicle                                       | 1                                     | 2   |      |

|      |                                                                          |                        |         |           |  |
|------|--------------------------------------------------------------------------|------------------------|---------|-----------|--|
| 6    | What is the main source of drinking water for members of your household? | Piped water into house | 1       |           |  |
|      |                                                                          | Public tap water       | 2       |           |  |
|      |                                                                          | Tube well or borehole  | 3       |           |  |
|      |                                                                          | Dug well               | 4       |           |  |
|      |                                                                          | Stone tap              | 5       |           |  |
|      |                                                                          | Others (specify)       | 6       |           |  |
|      |                                                                          | No response            | 88      |           |  |
| 7    | What type of fuel does your household mainly use for cooking?            | Electricity            | 1       |           |  |
|      |                                                                          | LPG                    | 2       |           |  |
|      |                                                                          | Biogas                 | 3       |           |  |
|      |                                                                          | Kerosene               | 4       |           |  |
|      |                                                                          | Wood/ Timber           | 5       |           |  |
|      |                                                                          | Others (specify)       | 6       |           |  |
|      |                                                                          | No response            | 88      |           |  |
| 8    | Do you have a separate room which is used as a kitchen?                  | Yes                    | 1       |           |  |
|      |                                                                          | No                     | 2       |           |  |
| 9    | How do you make decision on                                              | Independent            | Jointly | Dependent |  |
| 9.1  | Small household expenditures (e.g. toothpaste, batteries, etc.)?         | 2                      | 1       | 0         |  |
| 9.2  | Large household expenditures (e.g. television, refrigerator, etc.)?      | 2                      | 1       | 0         |  |
| 9.3  | Expenditures on women's clothes and jewelry?                             | 2                      | 1       | 0         |  |
| 9.4  | Woman's employment outside the home?                                     | 2                      | 1       | 0         |  |
| 9.5  | Purchase or sale of property?                                            | 2                      | 1       | 0         |  |
| 9.6  | Children's clothes and food?                                             | 2                      | 1       | 0         |  |
| 9.7  | Where to take children in the case of illness?                           | 2                      | 1       | 0         |  |
| 9.8  | Where to take the mother in case of illness?                             | 2                      | 1       | 0         |  |
| 9.9  | Purchase of medicine?                                                    | 2                      | 1       | 0         |  |
| 9.10 | Children's education?                                                    | 2                      | 1       | 0         |  |
| 9.11 | Use of contraception?                                                    | 2                      | 1       | 0         |  |
| 9.12 | Visits to relatives?                                                     | 2                      | 1       | 0         |  |

### Section 4: Essential Neonatal Care

| QUESTIONNAIRE                                                                                                                                     | RESULT                                                                                                                                                                                                                                                                                                                                                                                                                                                                                                                                                                                                                                                               | SKIP |     |    |                       |   |   |                                          |   |   |                              |   |   |                          |   |   |                                                  |   |   |                          |   |   |                                             |   |   |  |
|---------------------------------------------------------------------------------------------------------------------------------------------------|----------------------------------------------------------------------------------------------------------------------------------------------------------------------------------------------------------------------------------------------------------------------------------------------------------------------------------------------------------------------------------------------------------------------------------------------------------------------------------------------------------------------------------------------------------------------------------------------------------------------------------------------------------------------|------|-----|----|-----------------------|---|---|------------------------------------------|---|---|------------------------------|---|---|--------------------------|---|---|--------------------------------------------------|---|---|--------------------------|---|---|---------------------------------------------|---|---|--|
| Record name of last-born child from Section 1 here _____<br>Use this child's name in the following questions, where indicated.                    |                                                                                                                                                                                                                                                                                                                                                                                                                                                                                                                                                                                                                                                                      |      |     |    |                       |   |   |                                          |   |   |                              |   |   |                          |   |   |                                                  |   |   |                          |   |   |                                             |   |   |  |
| <b>1.</b> During ( <i>Name</i> ) your pregnancy, Did you have ANC check up in health facility?                                                    | Yes 1<br>No 2                                                                                                                                                                                                                                                                                                                                                                                                                                                                                                                                                                                                                                                        |      |     |    |                       |   |   |                                          |   |   |                              |   |   |                          |   |   |                                                  |   |   |                          |   |   |                                             |   |   |  |
| <b>2.</b> How many times did you receive antenatal care during this pregnancy?                                                                    | Number of times <input type="text"/> <input type="text"/><br>Don't know                                                                                                                                                                                                                                                                                                                                                                                                                                                                                                                                                                                              |      |     |    |                       |   |   |                                          |   |   |                              |   |   |                          |   |   |                                                  |   |   |                          |   |   |                                             |   |   |  |
| <b>3.</b> During last pregnancy did you receive following advices from the FCHV/ health worker (Self care)?<br><i>Ask each options separately</i> | <table border="0"> <thead> <tr> <th></th> <th>Yes</th> <th>No</th> </tr> </thead> <tbody> <tr> <td>Proper, balanced diet</td> <td>1</td> <td>2</td> </tr> <tr> <td>Avoid alcohol &amp; smoking during pregnancy</td> <td>1</td> <td>2</td> </tr> <tr> <td>Take rest &amp; avoid heavy work</td> <td>1</td> <td>2</td> </tr> <tr> <td>Health facility delivery</td> <td>1</td> <td>2</td> </tr> <tr> <td>Initiate breast feeding within one hour of birth</td> <td>1</td> <td>2</td> </tr> <tr> <td>Exclusive breast feeding</td> <td>1</td> <td>2</td> </tr> <tr> <td>Importance of immunization for newborn baby</td> <td>1</td> <td>2</td> </tr> </tbody> </table> |      | Yes | No | Proper, balanced diet | 1 | 2 | Avoid alcohol & smoking during pregnancy | 1 | 2 | Take rest & avoid heavy work | 1 | 2 | Health facility delivery | 1 | 2 | Initiate breast feeding within one hour of birth | 1 | 2 | Exclusive breast feeding | 1 | 2 | Importance of immunization for newborn baby | 1 | 2 |  |
|                                                                                                                                                   | Yes                                                                                                                                                                                                                                                                                                                                                                                                                                                                                                                                                                                                                                                                  | No   |     |    |                       |   |   |                                          |   |   |                              |   |   |                          |   |   |                                                  |   |   |                          |   |   |                                             |   |   |  |
| Proper, balanced diet                                                                                                                             | 1                                                                                                                                                                                                                                                                                                                                                                                                                                                                                                                                                                                                                                                                    | 2    |     |    |                       |   |   |                                          |   |   |                              |   |   |                          |   |   |                                                  |   |   |                          |   |   |                                             |   |   |  |
| Avoid alcohol & smoking during pregnancy                                                                                                          | 1                                                                                                                                                                                                                                                                                                                                                                                                                                                                                                                                                                                                                                                                    | 2    |     |    |                       |   |   |                                          |   |   |                              |   |   |                          |   |   |                                                  |   |   |                          |   |   |                                             |   |   |  |
| Take rest & avoid heavy work                                                                                                                      | 1                                                                                                                                                                                                                                                                                                                                                                                                                                                                                                                                                                                                                                                                    | 2    |     |    |                       |   |   |                                          |   |   |                              |   |   |                          |   |   |                                                  |   |   |                          |   |   |                                             |   |   |  |
| Health facility delivery                                                                                                                          | 1                                                                                                                                                                                                                                                                                                                                                                                                                                                                                                                                                                                                                                                                    | 2    |     |    |                       |   |   |                                          |   |   |                              |   |   |                          |   |   |                                                  |   |   |                          |   |   |                                             |   |   |  |
| Initiate breast feeding within one hour of birth                                                                                                  | 1                                                                                                                                                                                                                                                                                                                                                                                                                                                                                                                                                                                                                                                                    | 2    |     |    |                       |   |   |                                          |   |   |                              |   |   |                          |   |   |                                                  |   |   |                          |   |   |                                             |   |   |  |
| Exclusive breast feeding                                                                                                                          | 1                                                                                                                                                                                                                                                                                                                                                                                                                                                                                                                                                                                                                                                                    | 2    |     |    |                       |   |   |                                          |   |   |                              |   |   |                          |   |   |                                                  |   |   |                          |   |   |                                             |   |   |  |
| Importance of immunization for newborn baby                                                                                                       | 1                                                                                                                                                                                                                                                                                                                                                                                                                                                                                                                                                                                                                                                                    | 2    |     |    |                       |   |   |                                          |   |   |                              |   |   |                          |   |   |                                                  |   |   |                          |   |   |                                             |   |   |  |
| <b>4.</b> During last pregnancy, were you given an injection in the arm to prevent you and the baby from getting Tetanus?                         | Yes 1<br>No 2<br>Don't know 3                                                                                                                                                                                                                                                                                                                                                                                                                                                                                                                                                                                                                                        |      |     |    |                       |   |   |                                          |   |   |                              |   |   |                          |   |   |                                                  |   |   |                          |   |   |                                             |   |   |  |
| <b>5.</b> During last pregnancy, how many times did you get this Tetanus injection?                                                               | Times .....<br>Don't Know                                                                                                                                                                                                                                                                                                                                                                                                                                                                                                                                                                                                                                            |      |     |    |                       |   |   |                                          |   |   |                              |   |   |                          |   |   |                                                  |   |   |                          |   |   |                                             |   |   |  |
| <b>6.</b> What kind of preparation did you make beforehand for the delivery of ( <i>name</i> )?<br><br>Anything else?                             | Saved money 1<br>arranged for Transport 2<br>found blood donor 3<br>Contacted health worker to help with delivery 4<br>Arranged safe delivery kit 5                                                                                                                                                                                                                                                                                                                                                                                                                                                                                                                  |      |     |    |                       |   |   |                                          |   |   |                              |   |   |                          |   |   |                                                  |   |   |                          |   |   |                                             |   |   |  |

|                                                                                                                                                                                                                                                                  |                                     |       |                                         |
|------------------------------------------------------------------------------------------------------------------------------------------------------------------------------------------------------------------------------------------------------------------|-------------------------------------|-------|-----------------------------------------|
|                                                                                                                                                                                                                                                                  | Arranged food                       | 6     |                                         |
|                                                                                                                                                                                                                                                                  | Arranged clothes                    | 7     |                                         |
|                                                                                                                                                                                                                                                                  | Other (specify)                     | 8     |                                         |
|                                                                                                                                                                                                                                                                  | No preparation                      | 9     |                                         |
| <b>7.</b> Who assisted with the delivery of<br>(Name)? Anyone else?<br>if FCHV not mentioned probe<br><b>7.1.</b> If respondent says no one assisted,<br>probe to determine whether any adults,<br>relatives and family members were<br>present at the delivery. | Doctor                              | 1     |                                         |
|                                                                                                                                                                                                                                                                  | Nurse/midwife /ANM                  | 2     |                                         |
|                                                                                                                                                                                                                                                                  | Health asst./AHW                    | 3     |                                         |
|                                                                                                                                                                                                                                                                  | FCHVs                               | 5     |                                         |
|                                                                                                                                                                                                                                                                  | Relatives/ friends/family member    | 7     |                                         |
|                                                                                                                                                                                                                                                                  | Others (specify)                    |       |                                         |
|                                                                                                                                                                                                                                                                  | No one                              | 9     |                                         |
| <b>8.</b> Where did you give birth to (name)?<br>Probing                                                                                                                                                                                                         | Home.....                           | 1     | If Home<br>delivery,<br>go to Qn.<br>10 |
|                                                                                                                                                                                                                                                                  | District hospital.....              | 2     |                                         |
|                                                                                                                                                                                                                                                                  | Primary health care centre .....    | 3     |                                         |
|                                                                                                                                                                                                                                                                  | Health post .....                   | 4     |                                         |
|                                                                                                                                                                                                                                                                  | Private Medical Sector.....         | 5     |                                         |
|                                                                                                                                                                                                                                                                  | Non-Government Sector               | ___ 6 |                                         |
|                                                                                                                                                                                                                                                                  | Other (specify)                     | 96    |                                         |
| <b>9.</b> Why didn't you deliver in a health<br>facility?                                                                                                                                                                                                        | Cost too much                       | 1     |                                         |
|                                                                                                                                                                                                                                                                  | Facility not open                   | 2     |                                         |
|                                                                                                                                                                                                                                                                  | Too far/ no transportation          | 3     |                                         |
|                                                                                                                                                                                                                                                                  | Don't trust/ Poor quality service   | 4     |                                         |
|                                                                                                                                                                                                                                                                  | No female provider at facility      | 5     |                                         |
|                                                                                                                                                                                                                                                                  | Husband/family did not allow        | 6     |                                         |
|                                                                                                                                                                                                                                                                  | Security concerns                   | 7     |                                         |
|                                                                                                                                                                                                                                                                  | Not necessary                       | 8     |                                         |
|                                                                                                                                                                                                                                                                  | Not customary                       | 9     |                                         |
|                                                                                                                                                                                                                                                                  | Child born before reaching facility | 10    |                                         |
|                                                                                                                                                                                                                                                                  | Other (specify)                     | 11    |                                         |
| <b>10.</b> When (Name) was born, what<br>instrument was used to cut the umbilical<br>cord?                                                                                                                                                                       | New/clean blade                     | 1     |                                         |
|                                                                                                                                                                                                                                                                  | Used blade                          | 2     |                                         |
|                                                                                                                                                                                                                                                                  | Knife/ scissors                     | 3     |                                         |
|                                                                                                                                                                                                                                                                  | Hasiya/Khukuri                      | 4     |                                         |

|                                                                                                                                     |                           |                    |            |
|-------------------------------------------------------------------------------------------------------------------------------------|---------------------------|--------------------|------------|
|                                                                                                                                     | Other (specify)           | 7                  |            |
|                                                                                                                                     | Don't know                | 8                  |            |
| <b>11.</b> Was anything placed on the stump after the umbilical cord was cut?                                                       | Yes                       | 1                  |            |
|                                                                                                                                     | No                        | 2                  |            |
|                                                                                                                                     | Don't know                | 3                  |            |
| <b>12.</b> What was placed on the stump?                                                                                            | Oil 1                     | Ghee 5             |            |
|                                                                                                                                     | Ash 2                     | CHX 6              |            |
|                                                                                                                                     | Ointment/ Powder 3        | Other (specify) 7  |            |
|                                                                                                                                     | Animal dung 4             | Don't know . . . 8 |            |
| <b>13.</b> Was ( <i>Name</i> ) dried before the placenta was delivered?                                                             | Yes                       | 1                  |            |
|                                                                                                                                     | No                        | 2                  |            |
| <b>14.</b> Was ( <i>Name</i> ) wrapped in cloth before the placenta was delivered?                                                  | Yes                       | 1                  |            |
|                                                                                                                                     | No                        | 2                  |            |
|                                                                                                                                     | Don't Know                | 98                 |            |
| <b>15.</b> Was ( <i>Name</i> ) placed on your or others (father, grandmother) belly/breast before delivery of the placenta?         | Yes                       | No                 | Don't Know |
|                                                                                                                                     | Mother 1                  | 2                  | 98         |
|                                                                                                                                     | Father 1                  | 2                  | 98         |
|                                                                                                                                     | Others                    |                    | 96         |
| <b>16.</b> How long after delivery was ( <i>name</i> ) bathed for the first time?                                                   | Hours                     | 1                  | ___        |
|                                                                                                                                     | Days                      | 2                  | ___        |
|                                                                                                                                     | Weeks                     | 3                  | ___        |
|                                                                                                                                     | DK/Don't remember         |                    | 998        |
| <b>17.</b> Was ( <i>name</i> ) delivered by caesarean section? That is, did they cut your belly open to take the baby out?          | Yes                       | 1                  | No         |
|                                                                                                                                     |                           | 2                  |            |
| <b>18.</b> When ( <i>name</i> ) was born, was he/she very large, larger than average, average, smaller than average, or very small? | Very large .....          | 1                  |            |
|                                                                                                                                     | Larger than average ..... | 2                  |            |
|                                                                                                                                     | Average.....              | 3                  |            |
|                                                                                                                                     | Smaller than average..... | 4                  |            |
|                                                                                                                                     | Very small.....           | 5                  |            |

|                                                                                                                                                                  |                                                                                                                                                                                                                               |        |
|------------------------------------------------------------------------------------------------------------------------------------------------------------------|-------------------------------------------------------------------------------------------------------------------------------------------------------------------------------------------------------------------------------|--------|
|                                                                                                                                                                  | DK..... 8                                                                                                                                                                                                                     |        |
| 19. Was (name) weighted at birth?                                                                                                                                | Yes ..... 1<br>No ..... 2<br>DK..... 8                                                                                                                                                                                        |        |
| 20. How much did (name) weigh?<br><br>If a card is available, record weight from card.                                                                           | From card.....1 (kg) __ . __ __ __<br><br>From recall.....2 (kg) __ . __ __ __<br><br>DK..... 98                                                                                                                              |        |
| 21. How long after birth did you first put (Name) to the breast?<br><br>21.1. Did you feed colostrums to (Name) baby?                                            | Immediately 1<br>Hours 2<br>Days 3<br>DK/Don't remember 998<br>Yes<br>No                                                                                                                                                      |        |
| 22. In first 28 days after delivery, was (Name) given anything other than breast milk?                                                                           | Yes 1<br>No 2 →                                                                                                                                                                                                               | Qn. 24 |
| 23. What was (Name) given to drink?<br><br>Anything else?                                                                                                        | Milk (other than breast milk ) 1<br>Plain water 2<br>Sugar or glucose water 3<br>Gripe water 4<br>Sugar-salt-water solution 5<br>Fruit juice 6<br>Infant formula 7<br>Tea/infusions/Coffee 8<br>Honey 9<br>Other (Specify) 96 |        |
| 24. Check Qn8: Was the child delivered in a health facility?<br><br><input type="checkbox"/> Yes ⇒ Continue with Qn 21 <input type="checkbox"/> No ⇒ Go to Qn.24 |                                                                                                                                                                                                                               |        |
| 25. You have said that you gave birth in (facility- Qn8). How long did you stay there after delivery?                                                            | Hours __ __      Days 2 __ __<br>Weeks __ __      Don't know 998                                                                                                                                                              |        |



|                                                                                                                                                                                                                                         |                                                                   |        |                     |
|-----------------------------------------------------------------------------------------------------------------------------------------------------------------------------------------------------------------------------------------|-------------------------------------------------------------------|--------|---------------------|
| 26. Before you left the ( <i>facility</i> Qn8), did anyone check on ( <i>name</i> )'s health? e.g., someone examining ( <i>name</i> ), checking the cord, or seeing if ( <i>name</i> ) is alright.                                      | Yes<br>No                                                         | 1<br>2 |                     |
| 27. Did anyone check on ( <i>name</i> )'s health after you left ( <i>facility in EC13</i> )?                                                                                                                                            | Yes<br>No                                                         | 1<br>2 | 1⇒32<br>2⇒Section 4 |
| 28. Check Qn. 8: Did a health professionals or FCHVs assist delivery?<br><input type="checkbox"/> Yes ⇒ Continue with Qn. 29 <input type="checkbox"/> No ⇒ Go to 31                                                                     |                                                                   |        |                     |
| 29. After the delivery was over and before ( <i>person or persons in Qn8</i> ) left you, did they check on ( <i>name</i> )'s health? For example examining ( <i>name</i> ), checking the cord, or seeing if ( <i>name</i> ) is alright. | Yes<br>No                                                         | 1<br>2 |                     |
| 30. After the ( <i>person or persons in Qn. 8</i> ) left you, did anyone check on the health of ( <i>name</i> )?                                                                                                                        | Yes<br>No                                                         | 1<br>2 | 1⇒32<br>2⇒Section 4 |
| 31. After ( <i>name</i> ) was delivered, did anyone check on his/her health? For example, someone examining ( <i>name</i> ), Checking the cord, or seeing if the baby is alright.                                                       | Yes<br>No                                                         | 1<br>2 | 2⇒<br>Section 4     |
| 32. Did such a check happen only once or more than once?                                                                                                                                                                                | Once<br>More than once                                            | 1<br>2 | 1⇒32.1<br>2⇒32.2    |
| 32.1 How long after delivery did that check happen?                                                                                                                                                                                     | Hours 1 ___<br>Days 2 ___<br>Weeks 3 ___<br>DK/Don't remember 998 |        |                     |
| 32.2. How long after delivery did the 1st of these checks happen?                                                                                                                                                                       | Hours 1 ___<br>Days 2 ___<br>Weeks 3 ___<br>DK/Don't remember 998 |        |                     |

|                                                  |                                  |         |  |
|--------------------------------------------------|----------------------------------|---------|--|
| 33. Who checked on (name)'s health at that time? | Doctor                           | 1       |  |
|                                                  | Nurse/midwife /ANM               | 2       |  |
|                                                  | Health asst./AHW                 | 3       |  |
|                                                  | FCHVs                            | 5       |  |
|                                                  | Relatives/ friends/family member | 7       |  |
|                                                  | Others (specify)                 |         |  |
| 34. Where did this check take place?             | Home.....                        | 1       |  |
|                                                  | District hospital.....           | 2       |  |
|                                                  | Primary health care centre ..... | 3       |  |
|                                                  | Health post .....                | 4       |  |
|                                                  | Private Medical Sector.....      | 5       |  |
|                                                  | Non-Government Sector            | ___ 6   |  |
|                                                  | Other ( <i>specify</i> )         | 96      |  |
| 30. PNC within 24 hour                           | Yes..... <input type="text"/>    | No..... |  |
| 31. PNC after 24 hour to 7 days                  | Yes..... <input type="text"/>    | No..... |  |

## Section 5: Health Service Factors

| QUESTIONNAIRE                                                                                                                                                                                                                                                                                                                         | RESULT                                                                                                                                                                                                                                                                                                                                                                                                                                                                                                                                                                                                                                                                                                                                                                                                                                                                                                                                | SKIP     |    |          |                    |   |   |               |   |   |          |   |   |             |   |   |          |   |   |  |   |   |  |
|---------------------------------------------------------------------------------------------------------------------------------------------------------------------------------------------------------------------------------------------------------------------------------------------------------------------------------------|---------------------------------------------------------------------------------------------------------------------------------------------------------------------------------------------------------------------------------------------------------------------------------------------------------------------------------------------------------------------------------------------------------------------------------------------------------------------------------------------------------------------------------------------------------------------------------------------------------------------------------------------------------------------------------------------------------------------------------------------------------------------------------------------------------------------------------------------------------------------------------------------------------------------------------------|----------|----|----------|--------------------|---|---|---------------|---|---|----------|---|---|-------------|---|---|----------|---|---|--|---|---|--|
| <b>Problem in accessing maternal and newborn care</b>                                                                                                                                                                                                                                                                                 |                                                                                                                                                                                                                                                                                                                                                                                                                                                                                                                                                                                                                                                                                                                                                                                                                                                                                                                                       |          |    |          |                    |   |   |               |   |   |          |   |   |             |   |   |          |   |   |  |   |   |  |
| <p><b>1.</b> When you and your child are sick and/or want to get health service or treatment, is each of the following a big problem or not?</p> <p>Getting permission to go?</p> <p>Getting money needed for service?</p> <p>The distance to the health facility?</p> <p>Not wanting to go alone?</p> <p>Concern about security?</p> | <table style="width: 100%; border-collapse: collapse;"> <thead> <tr> <th style="width: 60%;"></th> <th style="width: 20%; text-align: center;">BP</th> <th style="width: 20%; text-align: center;">not a BP</th> </tr> </thead> <tbody> <tr> <td>Getting permission</td> <td style="text-align: center;">1</td> <td style="text-align: center;">2</td> </tr> <tr> <td>Getting money</td> <td style="text-align: center;">1</td> <td style="text-align: center;">2</td> </tr> <tr> <td>Distance</td> <td style="text-align: center;">1</td> <td style="text-align: center;">2</td> </tr> <tr> <td>Going alone</td> <td style="text-align: center;">1</td> <td style="text-align: center;">2</td> </tr> <tr> <td>Security</td> <td style="text-align: center;">1</td> <td style="text-align: center;">2</td> </tr> <tr> <td></td> <td style="text-align: center;">1</td> <td style="text-align: center;">2</td> </tr> </tbody> </table> |          | BP | not a BP | Getting permission | 1 | 2 | Getting money | 1 | 2 | Distance | 1 | 2 | Going alone | 1 | 2 | Security | 1 | 2 |  | 1 | 2 |  |
|                                                                                                                                                                                                                                                                                                                                       | BP                                                                                                                                                                                                                                                                                                                                                                                                                                                                                                                                                                                                                                                                                                                                                                                                                                                                                                                                    | not a BP |    |          |                    |   |   |               |   |   |          |   |   |             |   |   |          |   |   |  |   |   |  |
| Getting permission                                                                                                                                                                                                                                                                                                                    | 1                                                                                                                                                                                                                                                                                                                                                                                                                                                                                                                                                                                                                                                                                                                                                                                                                                                                                                                                     | 2        |    |          |                    |   |   |               |   |   |          |   |   |             |   |   |          |   |   |  |   |   |  |
| Getting money                                                                                                                                                                                                                                                                                                                         | 1                                                                                                                                                                                                                                                                                                                                                                                                                                                                                                                                                                                                                                                                                                                                                                                                                                                                                                                                     | 2        |    |          |                    |   |   |               |   |   |          |   |   |             |   |   |          |   |   |  |   |   |  |
| Distance                                                                                                                                                                                                                                                                                                                              | 1                                                                                                                                                                                                                                                                                                                                                                                                                                                                                                                                                                                                                                                                                                                                                                                                                                                                                                                                     | 2        |    |          |                    |   |   |               |   |   |          |   |   |             |   |   |          |   |   |  |   |   |  |
| Going alone                                                                                                                                                                                                                                                                                                                           | 1                                                                                                                                                                                                                                                                                                                                                                                                                                                                                                                                                                                                                                                                                                                                                                                                                                                                                                                                     | 2        |    |          |                    |   |   |               |   |   |          |   |   |             |   |   |          |   |   |  |   |   |  |
| Security                                                                                                                                                                                                                                                                                                                              | 1                                                                                                                                                                                                                                                                                                                                                                                                                                                                                                                                                                                                                                                                                                                                                                                                                                                                                                                                     | 2        |    |          |                    |   |   |               |   |   |          |   |   |             |   |   |          |   |   |  |   |   |  |
|                                                                                                                                                                                                                                                                                                                                       | 1                                                                                                                                                                                                                                                                                                                                                                                                                                                                                                                                                                                                                                                                                                                                                                                                                                                                                                                                     | 2        |    |          |                    |   |   |               |   |   |          |   |   |             |   |   |          |   |   |  |   |   |  |
| <p><b>2.</b> What time does it take to reach nearest health institution (BY foot)?</p> <p><b>3.</b> What time does it take to reach nearest Hospital (By foot)?<br/>(write the time in minute)</p>                                                                                                                                    | <p>PHC .....</p> <p>HP .....</p> <p>District hospital .....</p> <p>Private hospital .....</p> <p>Others (Specify) .....</p>                                                                                                                                                                                                                                                                                                                                                                                                                                                                                                                                                                                                                                                                                                                                                                                                           |          |    |          |                    |   |   |               |   |   |          |   |   |             |   |   |          |   |   |  |   |   |  |

| <b>Perceived Health services Quality</b>                                                                                                                                                                                           |                |          |         |       |                   |
|------------------------------------------------------------------------------------------------------------------------------------------------------------------------------------------------------------------------------------|----------------|----------|---------|-------|-------------------|
| 4. Now I want to ask you about your perception regarding the quality of maternal and child health services providing by the nearest health facility of your area. How much do you agree or disagree with the following statements? | Degree         |          |         |       |                   |
|                                                                                                                                                                                                                                    | Strongly Agree | Disagree | Neutral | Agree | Strongly Disagree |
| 4.1 Maternal and essential neonatal services are available in health facility                                                                                                                                                      | 5              | 4        | 3       | 2     | 1                 |
| 4.2 Confident that trained provider will be available                                                                                                                                                                              | 5              | 4        | 3       | 2     | 1                 |
| 4.3 Complete information given about any treatments                                                                                                                                                                                | 5              | 4        | 3       | 2     | 1                 |
| 4.4 Facility workers helpful                                                                                                                                                                                                       | 1              | 2        | 3       | 4     | 5                 |
| 4.5 Given enough time to tell the medical staff everything she wanted to                                                                                                                                                           | 1              | 2        | 3       | 4     | 5                 |
| 4.6 Medical staff listened carefully to what she had to say                                                                                                                                                                        | 1              | 2        | 3       | 4     | 5                 |
| 4.7 Facility workers talked politely                                                                                                                                                                                               | 5              | 4        | 3       | 2     | 1                 |
| 4.8 Proper privacy of service is maintained                                                                                                                                                                                        | 5              | 4        | 3       | 2     | 1                 |
| 4.9 Facility was adequately clean                                                                                                                                                                                                  | 5              | 4        | 3       | 2     | 1                 |
| 4.10 Facility has toilets with good condition                                                                                                                                                                                      | 5              | 4        | 3       | 2     | 1                 |
| 4.11 Drinking water was easily available in the facility                                                                                                                                                                           | 5              | 4        | 3       | 2     | 1                 |
| 4.12 The health care providers for women are adequate                                                                                                                                                                              | 5              | 4        | 3       | 2     | 1                 |

## KII Guideline

### Part I: Characteristics of health facility

|           |                                         |      |     |     |
|-----------|-----------------------------------------|------|-----|-----|
| <b>01</b> | Facility number                         |      |     |     |
|           | Date                                    | Time | Hr. | Min |
|           | Name and post of interviewee            |      |     |     |
|           | Work Experience                         |      |     |     |
|           | Trainings related to newborn            |      |     |     |
| <b>02</b> | Name of facility                        |      |     |     |
| <b>03</b> | Location of facility                    |      |     |     |
| <b>07</b> | Is health facility delivery provided?   |      |     |     |
|           | Separate bed for Newborn Inpatient Care |      |     |     |

| MAIN QUESTION                                                                                                                                                | PROBING                                                                                                                                                                                                                                                                                                                                                                                                                                                                                                                                                       |
|--------------------------------------------------------------------------------------------------------------------------------------------------------------|---------------------------------------------------------------------------------------------------------------------------------------------------------------------------------------------------------------------------------------------------------------------------------------------------------------------------------------------------------------------------------------------------------------------------------------------------------------------------------------------------------------------------------------------------------------|
| How ready is the health facility to provide newborn services?                                                                                                | <p>Is a person skilled in conducting deliveries present at the facility or on call at all the times, including holidays, to provide the delivery care?</p> <p>Was the electricity available all times in last 7 days?</p> <p>Was there an improved water source all times?</p> <p>Is there any access to emergency transport?</p>                                                                                                                                                                                                                             |
| <p>Has the facility (ies) provide following newborn services during last three months of the assessment?</p> <p><i>(also see the maternity register)</i></p> | <p><b><i>Neonatal care options</i></b></p> <p>Neonatal resuscitation</p> <p>KMC for premature or small babies and others</p> <p>Providers at the facility routinely initiate breast feeding within first hour of birth</p> <p>Providers at the facility routinely initiate breast feeding within twenty four hour of birth</p> <p>Providers at facility routinely dry and wrap newborns to keep them warm</p> <p>CHX application</p> <p>Postnatal health checks for newborn before leaving HF</p> <p>Postnatal health checks for newborn after leaving HF</p> |

|                                                                                                                        |                                                                                                                                                                                                                                                                                                                                                                                                           |
|------------------------------------------------------------------------------------------------------------------------|-----------------------------------------------------------------------------------------------------------------------------------------------------------------------------------------------------------------------------------------------------------------------------------------------------------------------------------------------------------------------------------------------------------|
| <p>What is the status of practicing essential neonatal care practices, especially by underprivileged ethnic groups</p> | <p><b>Care practices</b></p> <ul style="list-style-type: none"> <li>BPCR</li> <li>ANC visit</li> <li>Skilled care at birth (SBA assistance)</li> <li>Social support during labour</li> <li>Immediate thermal care</li> <li>Breast feeding initiation</li> <li>Clean and safe cord care</li> <li>Exclusive breast feeding</li> <li>Newborn bathing</li> <li>Postnatal health checks for newborn</li> </ul> |
| <p>What are the barriers seen regarding neonatal health care utilization in this community?</p>                        | <p>Socio-economic, cultural and health system barriers seen in the community</p> <p>How such barriers prevent from practicing recommended care practices</p>                                                                                                                                                                                                                                              |
